# Supplementary material
Source: publisher figshare collection journal article supplement (https://gsajournals.figshare.com/articles/dataset/_/14798814)
Supplement: Supplementary file 1 [file 1]

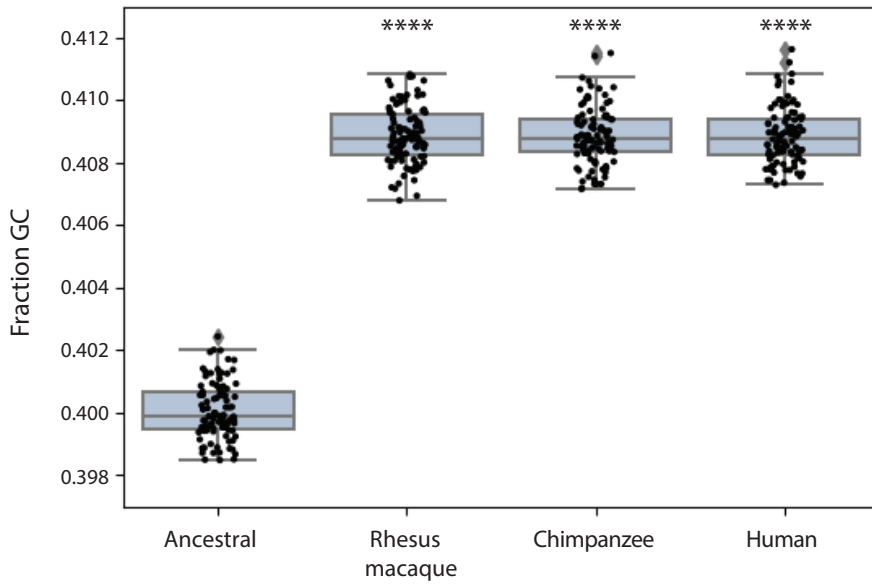

**Supplemental Figure S1:** Fraction GC content for simulated palindrome arms and ancestral sequence. Magnitude of GC bias = 0.70, starting GC content = 0.40. Each dot (n=100 for each category) represents median GC content for a set of 12 simulated palindromes. \*\*\*\*p<0.0001, Mann-Whitney U.
